# Supplementary material for: Frameshift variants in C10orf71 cause dilated cardiomyopathy in human, mouse, and organoid models
Source: JCI journal article supplement (doi:10.1172/jci177172), 2024-06-16
Supplement: sd2 [file 2]

301 Moved Permanently

# Moved Permanently

The document has moved here.
