# Supplementary material for: Frameshift variants in C10orf71 cause dilated cardiomyopathy in human, mouse, and organoid models
Source: JCI journal article supplement (doi:10.1172/jci177172), 2024-06-16

### Full unedited gel for Figure S15A

mC10orf71

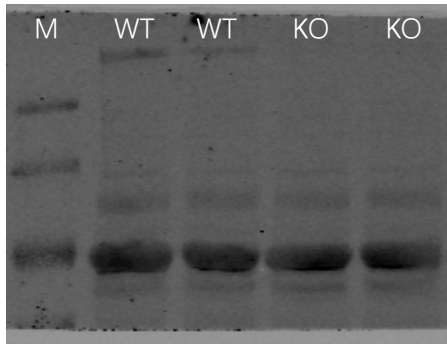

GAPDH

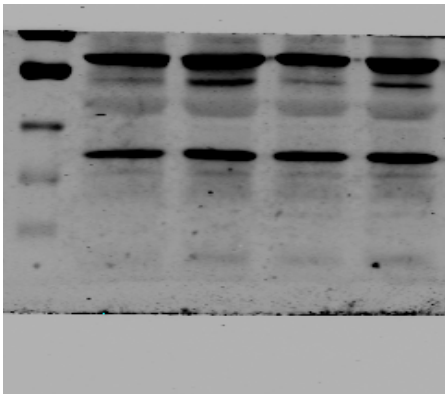

### Full unedited gel for Figure 5N

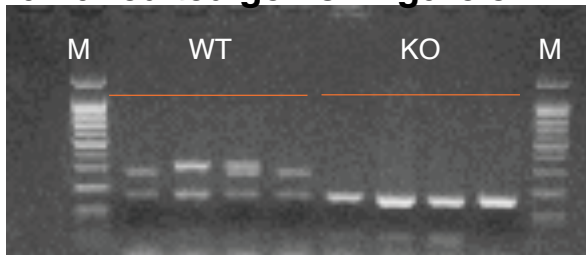

### Full unedited gel for Figure 5O

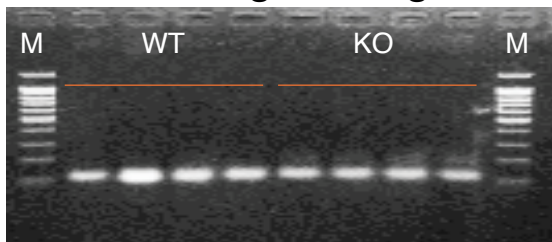

Supplement: sd2 [file 2]
